# Supplementary material
Source: PubMed Central journal article supplement (PMC2939451)
Supplement: NIHMS195223-supplement-1.pdf [file NIHMS195223-supplement-1.pdf]

**SUPPLEMENTAL DATA**

**Table S1.** TaqMan gene expression assays used for verification of 28 genes by real-time PCR

| <b>Genes</b> | <b>Assay ID</b> | <b>Genes</b> | <b>Assay ID</b> | <b>Genes</b> | <b>Assay ID</b> |
|--------------|-----------------|--------------|-----------------|--------------|-----------------|
| GAPDH        | Hs99999905_m1   | AKAP2        | Hs00364914_m1   | SPRR1A       | Hs00954595_s1   |
| ABCG2        | Hs00184979_m1   | RGS5         | Hs00186212_m1   | SPRR1B       | Hs00824893_m1   |
| p63          | Hs00186613_m1   | POSTN        | Hs01566748_m1   | SPRR2A       | Hs01655189_sH   |
| EGFR         | Hs00193306_m1   | LDB2         | Hs00609711_m1   | SPRR2B       | Hs00863465_m1   |
| TarKA        | Hs00176787_m1   | NNMT         | Hs00196287_m1   | SPRR2C       | Hs00272438_m1   |
| GDNF         | Hs01931883_s1   | STC1         | Hs00174970_m1   | SPRR3        | Hs00271304_m1   |
| Cx43         | Hs00748445_s1   | TCF4         | Hs00162613_m1   | CEACAM1      | Hs00989783_m1   |
| K3           | Hs00365080_m1   | TFPI         | Hs00196731_m1   | CEACAM6      | Hs00366002_m1   |
| K12          | Hs00165015_m1   | CTHRC1       | Hs00298917_m1   | HMOX1        | Hs00157965_m1   |
| involucrin   | Hs00846307_s1   |              |                 |              |                 |

**Table S2.** The numbers and percentages of the Present Calls in 54675 probe sets of each GeneChip from 2 arrays

| Affimetrix HG | Present Calls |      |         |      |
|---------------|---------------|------|---------|------|
|               | Array 1       |      | Array 2 |      |
| U133 Plus 2.0 | Number        | %    | Number  | %    |
| GeneChip ID   |               |      |         |      |
| NAC-1         | 19792         | 36.2 | 20120   | 36.8 |
| NAC-2         | 19956         | 36.5 | 20394   | 37.3 |
| SAC-1         | 19956         | 36.5 | 20448   | 37.4 |
| SAC-2         | 21105         | 38.6 | 21214   | 38.8 |
| RAC-1         | 21651         | 39.6 | 22089   | 40.4 |
| RAC-2         | 22143         | 40.5 | 22471   | 41.1 |

|      |       |      |       |      |
|------|-------|------|-------|------|
| Mean | 20767 | 38.0 | 21123 | 38.6 |
| SD   | 1005  | 1.8  | 975   | 1.8  |

**Table S3.** Affymetrix probe sets and accession numbers for the genes that are known as limbal stem cell associated or differentiation markers.

| <b>Limbal SC Markers</b>             | <b>Gene Symbol</b> | <b>Affymetrix Probe Sets</b> | <b>Gene Bank Accession No.</b> |
|--------------------------------------|--------------------|------------------------------|--------------------------------|
| <b>ABCG2</b>                         | ABCG2              | 209735_at                    | AF098951                       |
| <b>p63</b>                           | TP73L              | 209863_s_at, 211194_s_at     | AF091627, AB010153             |
| <b>Integrin <math>\alpha</math>9</b> | ITGA9              | 206009_at, 227297_at         | NM_002207, AI479176            |
| <b>integrin <math>\beta</math>1</b>  | ITGB1              | 1553678_a_at, 211945_s_at    | NM_133376, BG500301            |
| <b>EGFR</b>                          | EGFR               | 201983_s_at, 201984_s_at     | AW157070, NM_005228            |
| <b>enolase <math>\alpha</math>1</b>  | ENO1               | 201231_s_at                  | NM_001428                      |
| <b>Keratin 15</b>                    | KRT15              | 204734_at                    | NM_002275                      |
| <b>TrkA</b>                          | NTRK1              | 208605_s_at                  | NM_002529                      |
| <b>N-cadherin</b>                    | CDH2               | 203440_at                    | M34064                         |
| <b>CEBP-<math>\delta</math></b>      | CEBPD              | 213006_at, 203973_s_at       | AV655640, NM_005195            |
| <b>Connexin 43</b>                   | GJA1               | 201667_at                    | NM_000165                      |
| <b>E-cadherin</b>                    | CDH2               | 201131_s_at                  | NM_004360                      |
| <b>Keratin 12</b>                    | KRT12              | 207811_at                    | NM_000223                      |
| <b>Keratin 3</b>                     | KRT3               | 217325_at                    | X05421                         |
| <b>Involucrin</b>                    | IVL                | 214599_at                    | NM_005547                      |

**Table S4.** Affymetrix probe sets and accession numbers for the top up- and down-regulated genes ( $\geq 6$  fold,  $P \leq 0.005$ ) in RAC limbal epithelial progenitors

| <b>Gene</b>     | <b>Gene Bank</b>    | <b>Affymetrix</b> | <b>Gene</b>     | <b>Gene Bank</b>    | <b>Affymetrix</b> |
|-----------------|---------------------|-------------------|-----------------|---------------------|-------------------|
| <b>Symbol</b>   | <b>Accession No</b> | <b>Probe Sets</b> | <b>Symbol</b>   | <b>Accession No</b> | <b>Probe Sets</b> |
| <b>AKAP2</b>    | NM_007203           | 202760_s_at       | <b>A2M</b>      | NM_000014           | 217757_at         |
| <b>C10orf10</b> | AL136653            | 209183_s_at       | <b>ITM2A</b>    | AL021786            | 202746_at         |
| <b>RGS5</b>     | NM_025226           | 218353_at         | <b>CTHRC1</b>   | AA584310            | 225681_at         |
| <b>DARC</b>     | NM_002036           | 208335_s_at       | <b>C8orf4</b>   | NM_020130           | 218541_s_at       |
| <b>GIMAP6</b>   | NM_024711           | 219777_at         | <b>GIMAP8</b>   | AI611648            | 235306_at         |
| <b>APOLD1</b>   | NM_030817           | 221031_s_at       | <b>KRTAP3-2</b> | AJ406932            | 233534_at         |
| <b>PDK4</b>     | AV707102            | 225207_at         | <b>CEACAM1</b>  | X16354              | 209498_at         |
| <b>POSTN</b>    | D13665              | 210809_s_at       | <b>C15orf48</b> | AF228422            | 223484_at         |
| <b>LDB2</b>     | NM_001290           | 206481_s_at       | <b>HMOX1</b>    | NM_002133           | 203665_at         |
| <b>NNMT</b>     | NM_006169           | 202237_at         | <b>RNASE7</b>   | AK023343            | 233488_at         |
| <b>STC1</b>     | AI300520            | 204595_s_at       | <b>C6orf128</b> | AI125204            | 237016_at         |
| <b>RHOJ</b>     | AI583530            | 235489_at         | <b>KRT24</b>    | NM_019016           | 220267_at         |
| <b>EMCN</b>     | AF205940            | 222885_at         | <b>SLC6A14</b>  | NM_007231           | 219795_at         |
| <b>CSF2RB</b>   | AV756141            | 205159_at         | <b>CEACAM7</b>  | NM_006890           | 206199_at         |
| <b>AQP1</b>     | AL518391            | 209047_at         | <b>IL1RL1</b>   | NM_003856           | 207526_s_at       |
| <b>COL15A1</b>  | NM_001855           | 203477_at         | <b>SPRR2A</b>   | NM_006945           | 208539_x_at       |
| <b>MSRB3</b>    | AW027333            | 225782_at         | <b>SPRR1B</b>   | NM_003125           | 205064_at         |
| <b>TSPAN7</b>   | NM_004615           | 202242_at         | <b>SPRR1A</b>   | NM_005987           | 214549_x_at       |
| <b>SLC2A3</b>   | NM_006931           | 202499_s_at       | <b>CEACAM6</b>  | M18728              | 211657_at         |
| <b>TCF4</b>     | NM_003199           | 212386_at         | <b>CEACAM5</b>  | NM_004363           | 201884_at         |
| <b>TFPI</b>     | BF511231            | 213258_at         | <b>SPRR3</b>    | NM_005416           | 218990_s_at       |
